# Supplementary material for: Evaluation of gold fiducial marker manual localisation for magnetic resonance-only prostate radiotherapy
Source: Springer Nature journal article supplement (doi:10.1186/s13014-018-1029-7), 2018-06-05

RESEARCH

# Evaluation of gold Fiducial Marker manual localisation for Magnetic Resonance-only prostate Radiotherapy

Matteo Maspero<sup>\*</sup>, Peter R Seevinck (p.seevinck@umcutrecht.nl), Nicole J Willems (n.willems-2@umcutrecht.nl), Gonda G Sikkes (g.g.sikkes@umcutrecht.nl), Geja J de Kogel (G.deKogel@umcutrecht.nl), Hans CJ de Boer (J.C.J.deBoer-6@umcutrecht.nl), Jochem RN van der Voort van Zyp (J.R.N.vanderVoortvanZyp@umcutrecht.nl) and Cornelis AT van den Berg (c.a.t.vandenBerg@umcutrecht.nl)

<sup>\*</sup>Correspondence:

[m.maspero@umcutrecht.nl](mailto:m.maspero@umcutrecht.nl),  
[matteo.maspero.it@gmail.com](mailto:matteo.maspero.it@gmail.com)  
Universitair Medisch Centrum  
Utrecht, Heidelberglaan 100, 3508  
GA Utrecht, The Netherlands  
Full list of author information is  
available at the end of the article

RESEARCH

## Additional file 2 — Annotations on the FM localisation

As part of the supplementary material, we report the apparent length of the FMs for each observer and the time spent by each observer performing the FM localisation over all the patients. In particular, table 1 shows the mean, standard deviation (STD), range [min, max] of the apparent length, expressed in mm. The weighted mean over all the observer is  $7.5 \pm 0.6$  mm and  $7.7 \pm 0.7$  mm for localisation using a single and multiple sequences, respectively. Note that the apparent length was longer than the nominal length of the FM (5 mm). Table 2 reports the mean, STD and range of the time needed by each observer to perform the FM localisation using single and multiple sequences. The weighted mean over all the observer is  $5.8 \pm 1.4$  min. Note that all the RTTs localised the FMs first using a single and then multiple sequences for all the patients. The RTTs were free to chose the order of patients and whether concluding the procedure first for each the patients using both single and multiple sequences or first for all the patients using single sequence and then repeat for all the patients using multiple modalities. Possible differences in the way the RTTs performed the procedure does not permit to understand whether the FM localisation is faster using single or multiple sequences. In addition, a histogram reporting the frequency of unreliable FM localisation, as perceived by the RTTs is shown in figure 1 for four out of five observers; one of the observers did not report the reliability of the localisation. The observers reported the perceived reliability without distinction between localisation performed employing a single and multiple sequences.

**Table 1** Apparent detection length of the FMs as obtained performing the localisation using a single (bSSFP) or multiple (bSSFP, SPGR and GRE) sequences for each observer. All the values are expressed in mm.

| Sequence | Observer | mean | STD | Range       |
|----------|----------|------|-----|-------------|
| Single   | 1        | 8.3  | 1.9 | [3.1, 15.2] |
|          | 2        | 7.6  | 1.4 | [5.0, 13.2] |
|          | 3        | 7.1  | 1.3 | [3.0, 9.2]  |
|          | 4        | 7.4  | 1.8 | [3.2, 13.3] |
|          | 5        | 7.8  | 1.6 | [4.1, 15.2] |
| Multiple | 1        | 8.3  | 1.6 | [4.1, 14.2] |
|          | 2        | 7.7  | 1.5 | [4.0, 14.2] |
|          | 3        | 7.2  | 1.3 | [3.0, 9.1]  |
|          | 4        | 7.4  | 1.8 | [3.2, 13.3] |
|          | 5        | 7.7  | 1.2 | [4.0, 10.0] |

**Table 2** The mean, standard deviation (STD) and maximum time needed for the FM localisation procedure of each observer over all the FMs using single or multiple sequences, expressed in minutes.

| Observer | Single |     |         | Multiple |     |         |
|----------|--------|-----|---------|----------|-----|---------|
|          | mean   | STD | Maximum | mean     | STD | Maximum |
| 1        | 8.9    | 3.3 | 15      | 8.5      | 3.6 | 15      |
| 2        | 8.8    | 4.1 | 15      | 7.1      | 2.4 | 11      |
| 3        | 4.3    | 1.9 | 8       | 4.5      | 3.1 | 10      |
| 4        | 6.6    | 4.7 | 16      | 4.8      | 3.7 | 14      |
| 5        | 6.2    | 3.9 | 13      | 5.3      | 3.4 | 13      |

**Figure 1** Frequency of reported unreliable FM localisation according to four out of five observers. Note that patient P14 had hip implant and the results are here presented but were excluded in the statistical analysis.

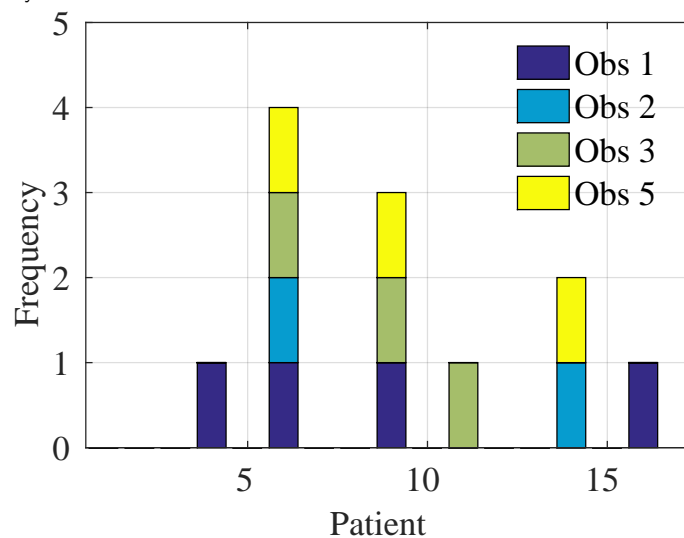

Supplement: MOESM2 [file 15821708]
