# Supplementary material for: Evaluation of gold fiducial marker manual localisation for magnetic resonance-only prostate radiotherapy
Source: Springer Nature journal article supplement (doi:10.1186/s13014-018-1029-7), 2018-06-05

RESEARCH

# Evaluation of gold Fiducial Marker manual localisation for Magnetic Resonance-only prostate Radiotherapy

Matteo Maspero<sup>\*</sup>, Peter R Seevinck (p.seevinck@umcutrecht.nl), Nicole J Willems (n.willems-2@umcutrecht.nl), Gonda G Sikkes (g.g.sikkes@umcutrecht.nl), Geja J de Kogel (G.deKogel@umcutrecht.nl), Hans CJ de Boer (J.C.J.deBoer-6@umcutrecht.nl), Jochem RN van der Voort van Zyp (J.R.N.vanderVoortvanZyp@umcutrecht.nl) and Cornelis AT van den Berg (c.a.t.vandenBerg@umcutrecht.nl)

<sup>\*</sup>Correspondence:

[m.maspero@umcutrecht.nl](mailto:m.maspero@umcutrecht.nl),  
[matteo.maspero.it@gmail.com](mailto:matteo.maspero.it@gmail.com)  
Universitair Medisch Centrum  
Utrecht, Heidelberglaan 100, 3508  
GA Utrecht, The Netherlands  
Full list of author information is  
available at the end of the article

RESEARCH

## Additional file 3 — Single patient investigation

As a supplementary material, we report CT and MRI images for the patients P4 and P6, which were found having LoA > 2 mm in maximum one of the three FMs for localisation performed with multiple sequences. Zoom of an axial slice of CT (top left), bSSFP (top centre-left), SPGR (top centre-right) and GRE (top right) images for the patients P4, P6 before image registration as well as schematic representations of the centres of the FMs as localised by all the observers (bottom) are shown in figure 1 and figure 2, respectively. For completeness, we report also the CT and MRI images along with the schematic representation of the centres of the FM for patient P14 in figure 3. Note that this patient was not considered during the analysis since had a hip implant.

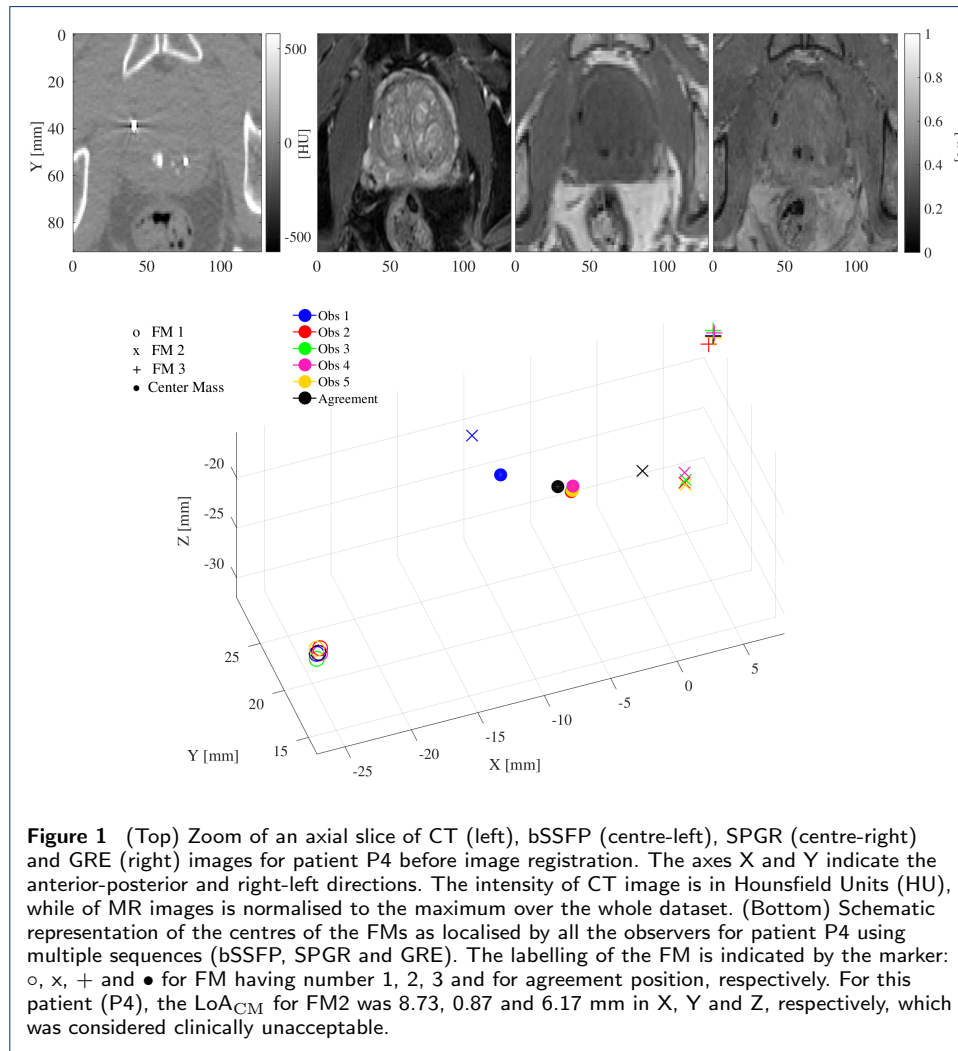

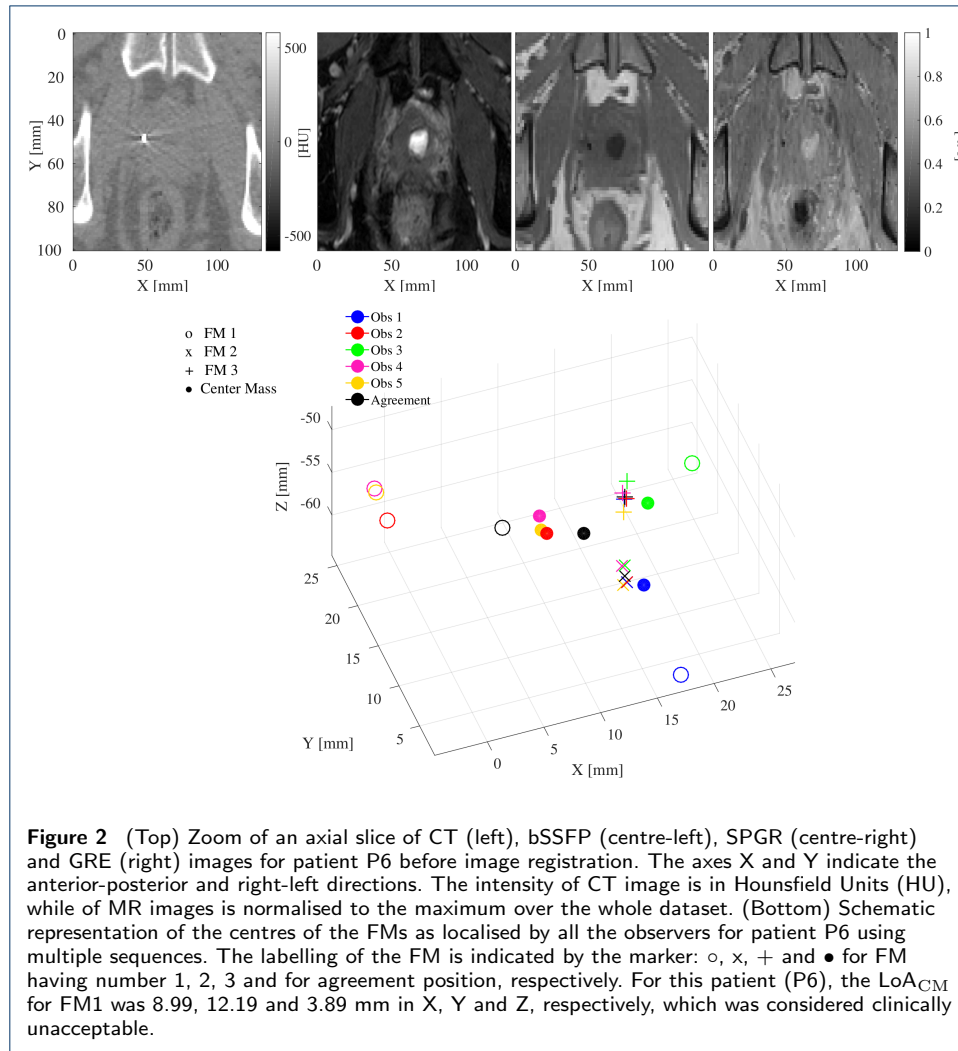

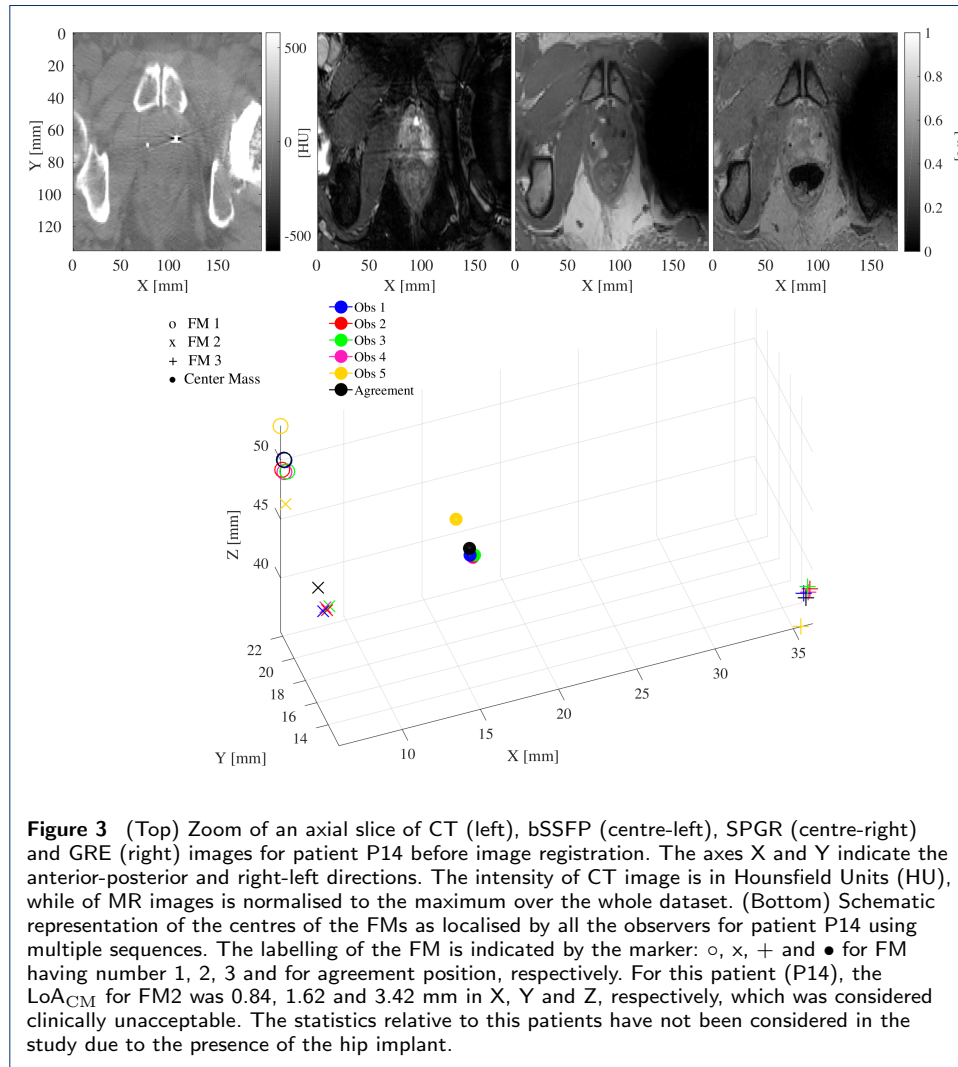

Supplement: MOESM3 [file 15821708]
